# Supplementary material
Source: PubMed Central journal article supplement (PMC4456356)
Supplement: NIHMS666541-supplement-2.pdf [file NIHMS666541-supplement-2.pdf]

A

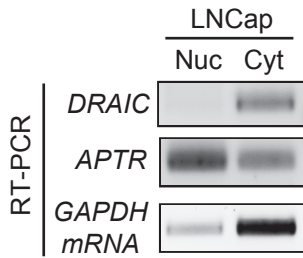

B

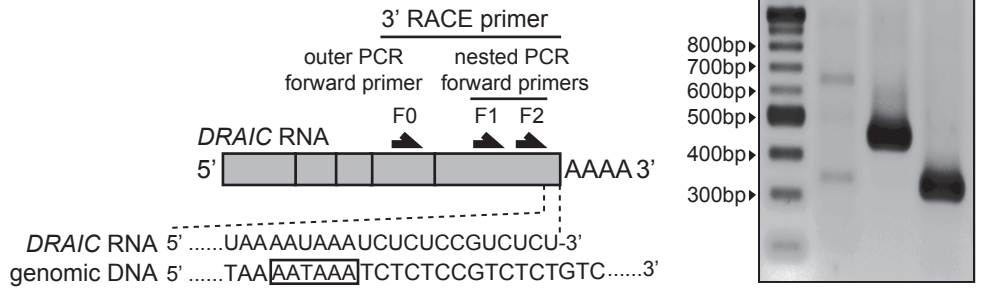

Supplementary Figure 1. Sakurai et.al.

A

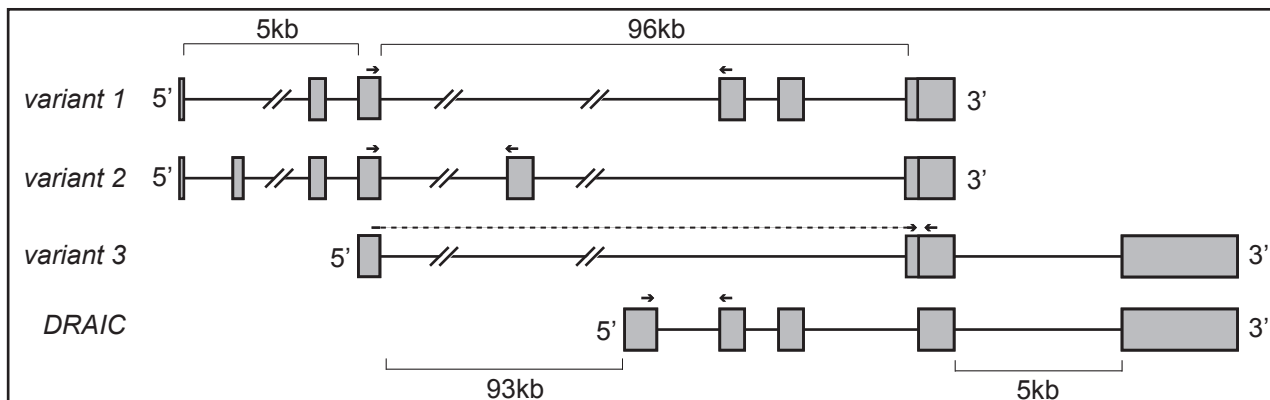

B

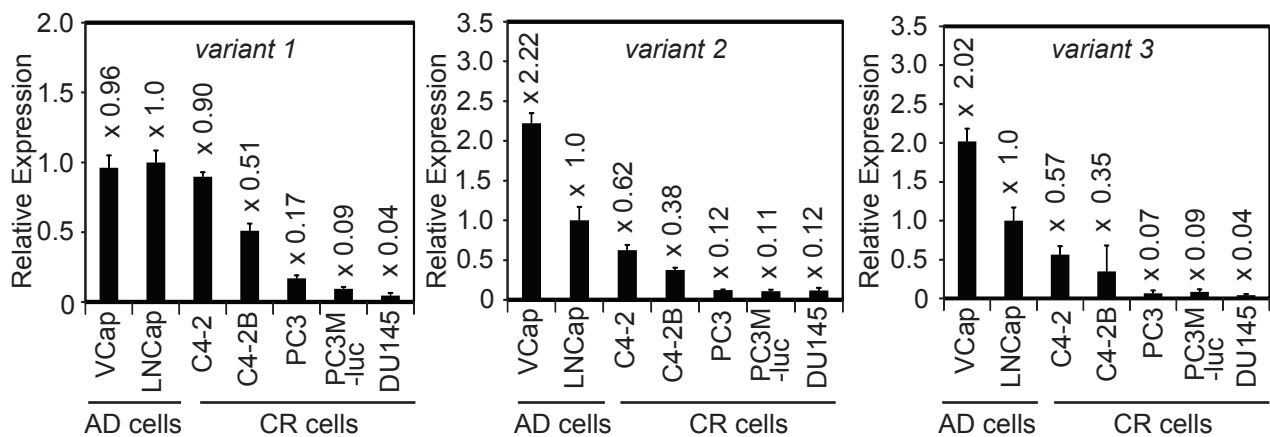

Supplementary Figure 2. Sakurai et.al.

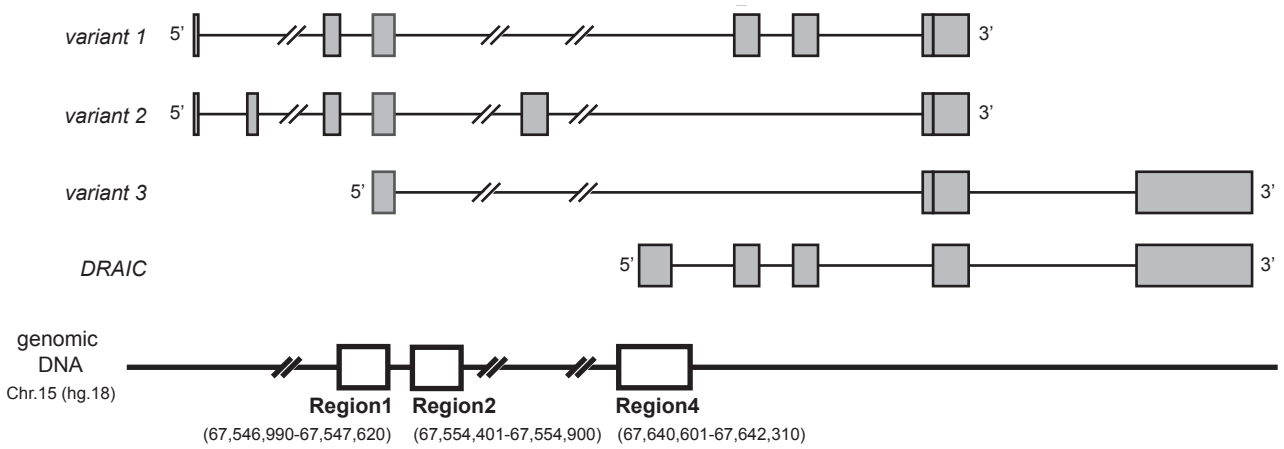

### Region1

```
CCCTGGCGGACAGAGGCTGCTGGGTAAGAGAGATTAGTCTGTTCACAACAGTGTGGGGCTTCGACAAGCCCTGACCTCTCTG
GCCCTGGTGTCTCAGCTTGCATGAAGGGCTTTGAGGATGCTCCAGCTCCACATGGCCAATCCCGACTCCCTCCAGGGCCCT
GTGGGGCCCTGCGGACAGTGGCCAGTGGAGTACCTCCAGCCCGGGGGCCCAATTAGCTCTTGCTCTGTGACTCTCAGGTAAC
TTCTTGTGTTCACGAAAGATTCTTTAAGACGGGCTAAGCACACGGTTACTCTGTAACAAGCTTGGCATTATTGTGAGGAC
CTGTGTGACTATTCTCGAGTCCATTGACACTACTGAGAACTGACGCAAAACAAGGAGACCTCTGGGAGCTCTGAGGCC
GACATTGTCTGGGGAAGGACTCCAGAAAGGCCATCCTTCTGTTGGTGAATACCTTGTGAGAGTAAAAATAACAATAATA
GGCACCATAAGAGATTCTAATGATCTCTTTACTTTTAGGTTAGTATCTGAACACTTTTGTAAAGTCTCTGGAAAGCTCCCTGTG
TTAATT
```

AR sites

FOXA1 sites

NKX3-1 sites

CTGGTGTCTCT

TAAAAATA

### Region2

```
GGGGCCGACTTTGAGCCACTGTCCCTGGGCTGTCTGTCTGAGTACCCCTCAGTCCAGCTGCAGATCTAGAGCTGCACCTGA
GTCAGCAGTGGGACCTGAGTCTCAAAACGGCAGAGGAGTCTGGCTGTCTGCTGAGGTAGTGCATGAGGAAATGGATTCTCTGTGCTG
GCTGGGTGGCTCTGGCTGTCAATTGTCTCTTTGGACCCGTGCTCTCACAGCATAGTCTGGGACTGCATGGCTCTCAAAAATA
TTACTTGTCTATATGAGACAGGTACAGTACTGCTGTGAGAATGAAGAGTAACAATAGAGACTTTGGCAGGGTGCAGTGGCC
AAGCTGTAATCTGGCCTTTGGCAGGCCAAGAGGAGGAGTGCCTTGAAGCCAGGAGTATGAGACCAGCTGGGCAACATGGTGG
AATCTATCTACAAAAATAACAAAAATAGTCAGGTGTGGTGTGACTACT
```

CCACTGTCCC

GCTGTCTCT

TCCTGTCTCT

CATTGTCTCT

GGTACAGTAA

GGTACACGCT

TCAAAAATA

AAAAAATA

AAAAAATA

TAAGTA

### Region4

```
GCCTGACCTGGATTAAAGATTGCAAGAAGACAAATCCAAACAGATGCCATTAGGGCCGTGACAGCCGACGTTAAAGATAACA
TTTACATTCGCCGGGTTTGTATCTCTGTCTCCCACTCGGCCCTCTCTTCTCCTGGTGGATCAATACCTCGGTTGAGGTTACGTG
GAGGTGGCCACATCTTTAAGCTGTGTGCTCAGTGTGGTTGTCTGTCTA ACACGCTGGGCACTTCTTCCAAACAGCCCTGTTTGCC
AGCAATTAGGGCTGTGTTGTTGAAACACTAGCCCAATCCGAGGGGGCTCAGCTTTCTAAACAGTGTGGTCCCGAATCTGTCAATCAATA
CAACAAATGGGTTCTGATACACAGCAGCAAGTGTGGCCAAATATTTCCAAACAGCTCTCTCCCTGCACTGACTGTCC
CCCAGCTTACTAAAAGACCAGTACACGCGCATGGCTGTCTGGGAAGATACAATGTGGCAAAACAGGGAGCTGGTTCCAGGAAAG
AAGGGACATGAGCAACATGATGGCCCTTTATGAGAGGTAATTTACTGAAATGCACAGCGATTACCTGCTACCCAGCCCTGATGT
ATTAAAAATGCAAGGCTAAGGGCTCTGTTTCCCGGCTCTGGCAGAGAAACCTGGGTTTGACTGTGTGAAGCTTGAGGTTGGATGTGG
GAATTTGGCTGAGTATAGGCGATGAGAGGGAATTAGGATATTATGAGCCCGTGAACCTCAACTCTGAGAGAGGACGCAGCAGAGC
GAGAGAAAAGTATCTTCAAAGAGCGTATGTTTCAGTGGTACGGGCTTTCTTTGGGATGAGGAAAAAATGTTTAGAAGTGTG
AGAGGTTGTTGTTGTCAGCATCGTGAATGGACTAAATGCCAAAGAAATCGTTCACTTAAAAATGTTAATTTATGTTGTGAAATTC
ATCGAAAAAATAAAAAATGAAATCCCAATGAACCCGGGTCTGTTACATTTAGAAAGCTCTAATGCCCTAATCAGGGTTTGG
CTCAGAGTAAATGCTTAATAATGTTTATGAAAGAACAACTAACATTTGACAGTCAACAAAGCTCTTTGTTATACATTAGCTACTT
CAATTTTAAGAATCTCTGAGGTTGGCAGGGGTAAGCATTTCTGTTGTAAAGGGGAAACTAAGGCTTTGAGAGGAGTGTGGCTGG
ACAGTGTCACTAGCTAGTGGCAGCACTGCCAGAAATCAAAACCAAAAGTCTCTGGTCCAAAGTCTGTGCTGTTGAAAGCATACTT
TTGTCTACCTCATGGCTTTCAGGATGGGAAAGAAACAAATAGGGTTTAAAAATAATGTTCTCTCCCTCTTTTTTAAAGGGTATTTA
CTAAAGTGTTTTTAAACTGGACCACTGAGTAAAGTCACTCACTCTACTGTCTAGCAGAGTGTGATAAATAATTTGCTGGCTGCA
TTCAGCTCAGCTGCAGAGCACTACTGTGTTGCTGTGGCAGCTGTCCGGCCAAAGCTCAGGCAGCTGGAAGTATCAGTGAAGCCA
GAAGATCTCAGCTGTTCAGGGCTGTGAGGAGGAGTCAAGGCTGGGGTTGTGTCTCTGGCAGCAATGAGCACTGCAATGGGGGA
GCCTGTGCTGGGCTGGCC
```

TAAAAATG

TTAAAAATG

AATTTTTAT

AAAAAATA

CATTTTTA

TATTTTGT

TTAAAAATA

TATTTAAT

TGACTGTCCC

CGACTGTCCG

TTTGTGTCTCT

| RT-qPCR primer        |         | sequence                   | Reference                                |
|-----------------------|---------|----------------------------|------------------------------------------|
| <i>DRAIC</i>          | forward | TGAACTCAACTCCTGAGAAGGAC    |                                          |
|                       | reverse | CGCTCTCAGACTCTTCAGTTCTC    |                                          |
| <i>DRAIC variant1</i> | forward | GACAGTCACTTCCTCTGTGGT      |                                          |
|                       | reverse | CGCTCTCAGACTCTTCAGTTCTC    |                                          |
| <i>DRAIC variant2</i> | forward | TCAGTCTTCTCATCCCTAAGCAC    |                                          |
|                       | reverse | TTCTTAAAACAACTGTCCGTGT     |                                          |
| <i>DRAIC variant3</i> | forward | CTCATCCC TAAGGAAC TTGGAATA |                                          |
|                       | reverse | CGTGTCA TTT CATGTTGGTACAG  |                                          |
| <i>LOC728431</i>      | forward | CAGGGTGAGAACCTACTTCTTCAT   |                                          |
|                       | reverse | ATCTCCTTTTGAGCATGGATGTAT   |                                          |
| <i>FOXA1</i>          | forward | GAAGATGGAAGGGCATGAAA       | Cancer Res<br>2013;73:3725-3736.         |
|                       | reverse | GCCTGAGTTCATGTTGCTGA       |                                          |
| <i>NKX3-1</i>         | forward | CAGAACGACAGCTGAGCAC        |                                          |
|                       | reverse | TGAAGTGT TTT CAGAGTCCAACA  |                                          |
| <i>PCAT29</i>         | forward | GAGATGGAAGGGCATGAAA        | Mol Cancer Res.<br>2014;12:1081-7        |
|                       | reverse | CATCTCCCACCTCTGCTCTC       |                                          |
| <i>GAPDH</i>          | forward | CTCTGCTCCTCTGTTTCGAC       | J. Biol. Chem. 2012,<br>287:11924-11933. |
|                       | reverse | TTAAAAGCAGCCCTGGTGAC       |                                          |

| semi-quantitative RT-PCR |         | sequence                 | Reference                      |
|--------------------------|---------|--------------------------|--------------------------------|
| <i>DRAIC</i>             | forward | ATTACTGAAATGCACAGCGATT   |                                |
|                          | reverse | AGCTTGTCTTTTCTGGGTCTCT   |                                |
| <i>APTR</i>              | forward | TGTGGGTACAAAAGGAGTAACAT  | PLoS ONE 9(4):<br>e95216.      |
|                          | reverse | GTAGATCTGGAGCTGCAACTACAG |                                |
| <i>GAPDH</i>             | forward | TCCCATCACCATCTTCCA       | PNAS, 2008<br>105(5):1608-1613 |
|                          | reverse | CATCACGCCACAGTTTCC       |                                |

| siRNA        | sequence (3'overhang dTdT is added in all siRNAs) | Reference                                             |
|--------------|---------------------------------------------------|-------------------------------------------------------|
| siGL2        | sense                                             | Mol Cell Biol. 2013<br>33(16):3309-20.                |
|              | antisense                                         |                                                       |
| siAR         | sense                                             | Biochem Biophys Res<br>Commun.<br>2010 391(1):1075-9. |
|              | antisense                                         |                                                       |
| siFOXA1 no1  | sense                                             | Cancer Res<br>2013;73:3725-3736.                      |
|              | antisense                                         |                                                       |
| siFOXA1 no2  | sense                                             |                                                       |
|              | antisense                                         |                                                       |
| siNKX3-1 no1 | sense                                             |                                                       |
|              | antisense                                         |                                                       |
| siNKX3-1 no2 | sense                                             |                                                       |
|              | antisense                                         |                                                       |
| siDRAIC no1  | sense                                             |                                                       |
|              | antisense                                         |                                                       |
| siDRAIC no2  | sense                                             |                                                       |
|              | antisense                                         |                                                       |

| shRNA       | sequence  | Reference |
|-------------|-----------|-----------|
| shGL2       | sense     |           |
|             | antisense |           |
| shDRAIC no1 | sense     |           |
|             | antisense |           |
| shDRAIC no2 | sense     |           |
|             | antisense |           |

| qPCR primer for ChIP assay    |         | sequence                  | Reference                          |
|-------------------------------|---------|---------------------------|------------------------------------|
| <i>DRAIC promoter Region1</i> | forward | ATTCTTTT AAGACGGGCTAAGCA  |                                    |
|                               | reverse | CGTTAACGTTTCTCAGTGAGTGTC  |                                    |
| <i>DRAIC promoter Region2</i> | forward | CTCACAGCATAGTCTGTGGACTG   |                                    |
|                               | reverse | ACCCTGCCAAAAGTCTCTATGTT   |                                    |
| <i>DRAIC promoter Region3</i> | forward | TGACTGTATCAGAAGCTGTCCAC   |                                    |
|                               | reverse | TTAATATTCTGCTGACACCATCG   |                                    |
| <i>DRAIC promoter Region4</i> | forward | AGTGTCTGGTTTGTCTGCTA      |                                    |
|                               | reverse | CGGGGACCAACTGTTTAGAA      |                                    |
| <i>PSA promoter</i>           | forward | GCCTGGATCTGAGAGAGATATCATC | Oncogene. 2014;<br>33(11):1448-57. |
|                               | reverse | ACACCTTTTTTTTCTGGATTGTTG  |                                    |
| <i>SLUG promoter</i>          | forward | CAGGAGAAAATGCCTTTGGA      | Cancer Res<br>2013;73:3725-3736.   |
|                               | reverse | ATGAGGAATCTGGCTGCTGT      |                                    |

| 3'RACE primer                 |  | sequence                | Reference |
|-------------------------------|--|-------------------------|-----------|
| outer forward primer          |  | GAAGTGCTGTGATGGTTCATTTT |           |
| inner forward1 for nested PCR |  | CAGTAAAGCAGGTTACCCACCAT |           |
| inner forward2 for nested PCR |  | AAAGAAGATGGAATTCTCCTTGA |           |

| cloning PCR primer |         | sequence                            | Reference |
|--------------------|---------|-------------------------------------|-----------|
| <i>DRAIC</i>       | forward | GAGGGATCCCAGGGAGCTGGTTCCAGGAAAG     |           |
|                    | reverse | GAGCTCGAGGACAGAGACGGAGAGATTTATTTAAG |           |
| <i>FOXA1</i>       | forward | GAGAAGCTTATGTTAGGAACTGTGAAGATGG     |           |
|                    | reverse | GAGCTCGAGCTAGGAAGTGT TAGGACGGGTCT   |           |

Supplementary Table 1. Sakurai et.al.
